# Supplementary material for: Parallel developmental genetic features underlie stickleback gill raker evolution
Source: PubMed Central journal article supplement (PMC4029907; doi:10.1186/2041-9139-5-19), 2014-05-12

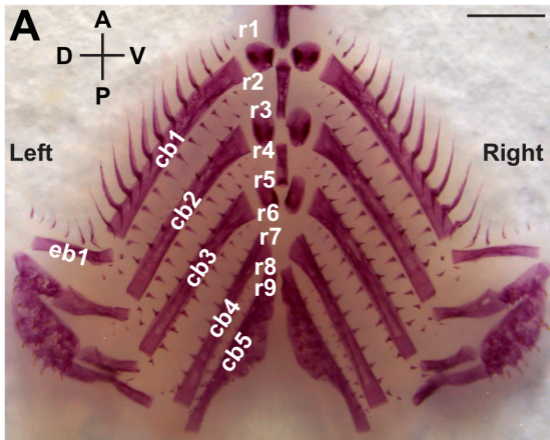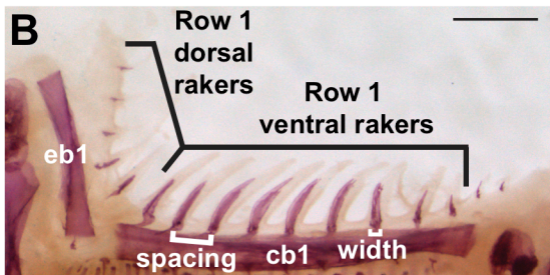

Supplement: 2041-9139-5-19-S1.pdf [file 2041-9139-5-19-S1.pdf]
