# Supplementary material for: Parallel developmental genetic features underlie stickleback gill raker evolution
Source: PubMed Central journal article supplement (PMC4029907; doi:10.1186/2041-9139-5-19), 2014-05-12
Supplement: 2041-9139-5-19-S9.pdf [file 2041-9139-5-19-S9.pdf]

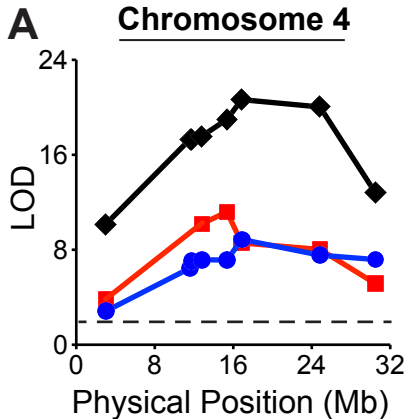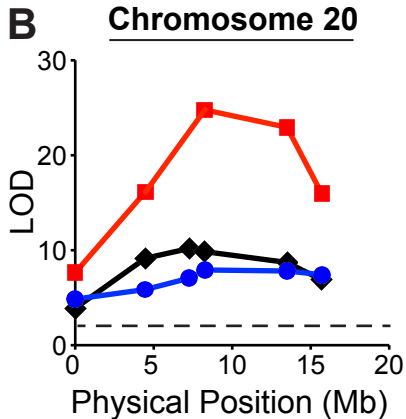

● PAXB x LITC      ◆ FTC x LITC      ■ BEPA x LITC
